# Supplementary material
Source: PubMed Central journal article supplement (PMC4279931)
Supplement: 10.3163.1536-5050.103.1.006.sg001.pdf [file 10.3163.1536-5050.103.1.006.sg001.pdf]

**New Mexico practitioners' access to and satisfaction with online clinical information resources: an interview study using qualitative data analysis software**

**Patricia V. Bradley, MLS, AHIP; Christina M. Getrich, PhD; Gale G. Hannigan, PhD, AHIP**

**APPENDIX**

**Improving health information access equity for unaffiliated health care practitioners in New Mexico: an interview study**

**Introduction**

1. What health topics are of particular concern in your practice?

**Information-seeking behavior**

2. When you are faced with making a patient care-related decision and you need more information, what do you do? (Prompt: provide examples)
3. When a clinical question arises, are you generally able to attempt to answer it immediately or do you have to research it later?
4. What percentage of the time would you say you found the information you were looking for? Immediately or later?

**Resources**

5. What is your favorite information resource: For your own clinical care? To give to patients? Why?
6. In the past year, have you used PubMed/MEDLINE? (Prompt: if they have used it, ask how many times in the past year? Do you usually find what you were looking for?)
7. What additional information resources would help you in your clinical decision making?

**Satisfaction**

8. How satisfied are you with the availability of: (a) clinical care information (professional) resources? (b) information for your patients? Please elaborate.

**Conclusion**

9. If we were to design an information resource at no cost to you, what would you like to see in terms of content, design, and features?
